# Supplementary material for: HIV-2 genomic RNA accumulates in stress granules in the absence of active translation
Source: PubMed Central journal article supplement (PMC4227750; doi:10.1093/nar/gku1017), 2014-10-28
Supplement: supp_gku1017_nar-01386-y-2014-File011.pdf [file supp_gku1017_nar-01386-y-2014-File011.pdf]

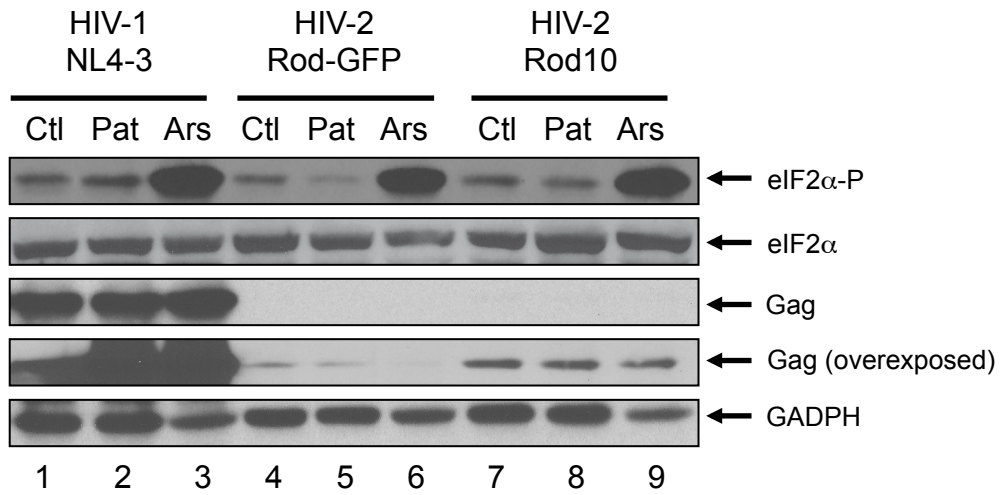

**Figure S1:** Cell lysates from HIV-1- or HIV-2-expressing cells were analyzed for eIF2α-P (Ser51), eIF2α, Gag and GAPDH by Western blot. Ctl: Control (Untreated); Pat: Pateamine A; Ars: Sodium Arsenite

A

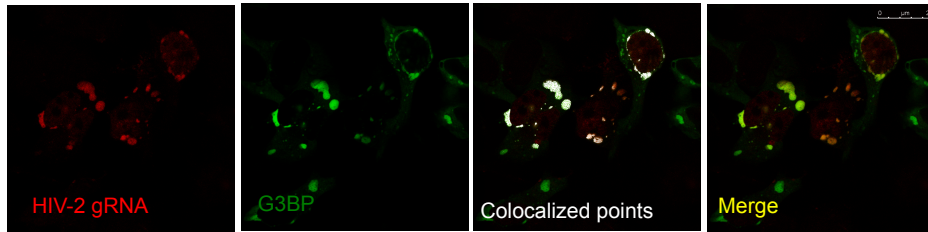

B

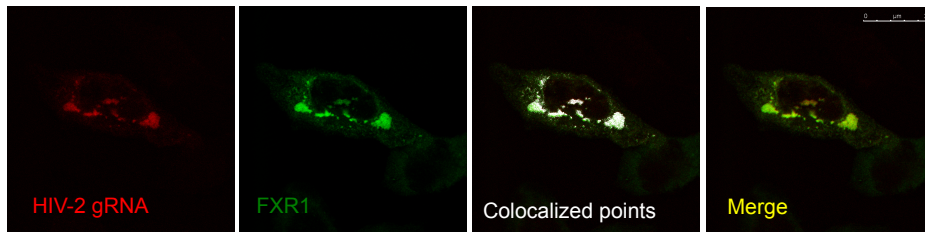

**Figure S2:** HeLa cells were co-transfected with 0,5  $\mu\text{g}$  of HIV-2 proviral DNA (pRod10) and 0,5  $\mu\text{g}$  of pEGFP-G3BP1 (**A**) or 0,25  $\mu\text{g}$  of EGFP-FXR1 (**B**) and subjected to RNA FISH and spectral confocal microscopy as described in Materials and Methods.

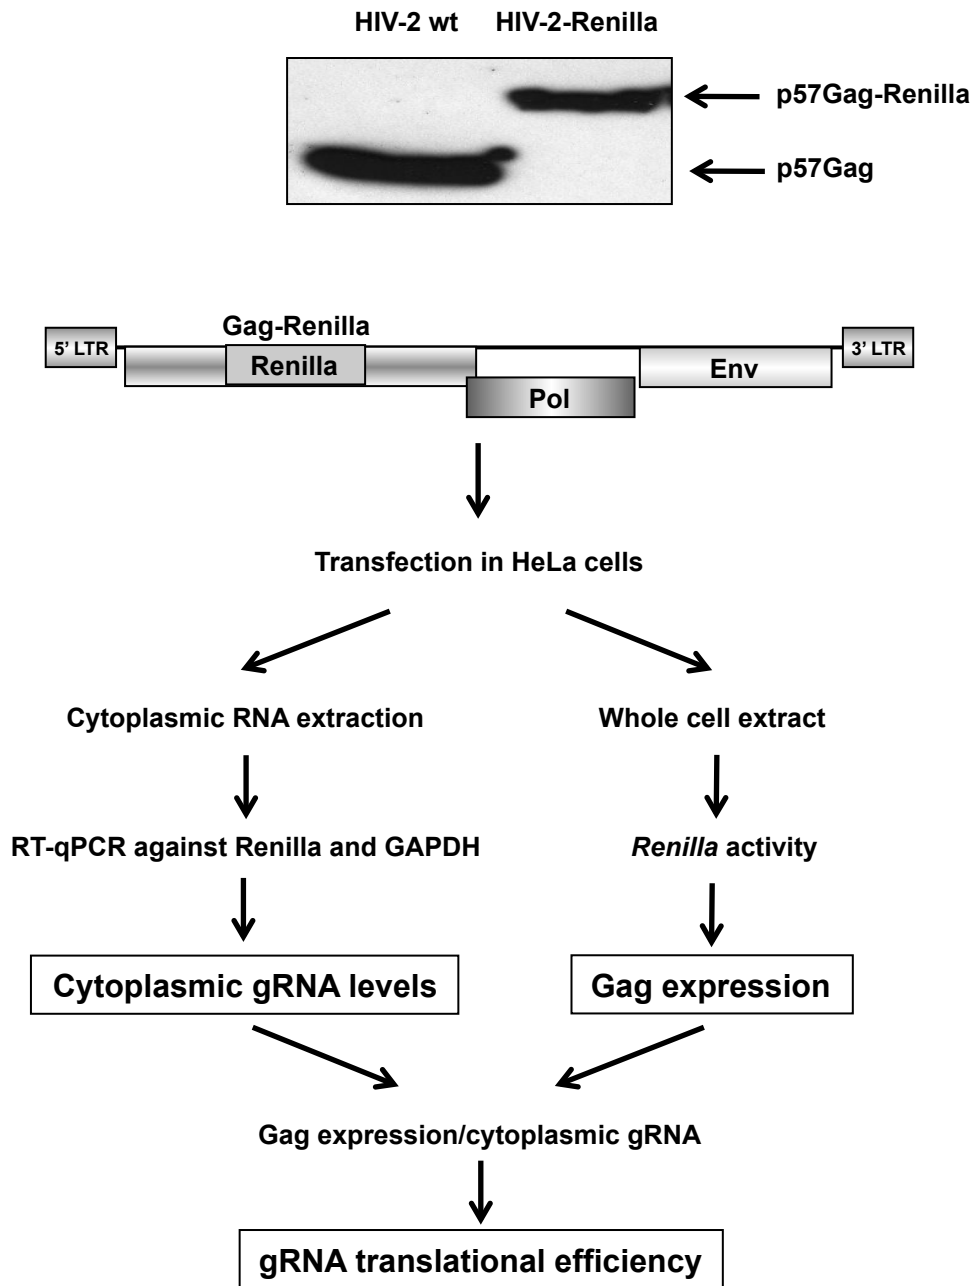

**Figure S3:** The HIV-2 Rod-*Renilla* proviral DNA produces a fusion Gag-*Renilla* protein (see Western blot). Upon transfection, cell extracts are prepared to both quantify the cytoplasmic levels of the gRNA by RT-qPCR or to measure the activity of the Gag-*Renilla* fusion protein and determine Gag expression. The ratio between Gag expression (Gag-*Renilla* activity) and cytoplasmic gRNA give us the translational efficiency of the gRNA.
